# Supplementary material for: Candida albicans rvs161Δ and rvs167Δ Endocytosis Mutants Are Defective in Invasion into the Oral Cavity
Source: PubMed Central journal article supplement (PMC6851284; doi:10.1128/mbio.02503-19), 2019-11-12

no treatment

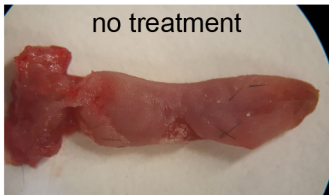

*spf1* $\Delta$

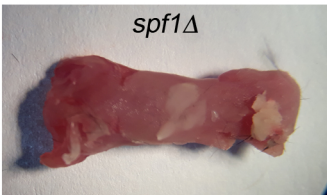

cortisone

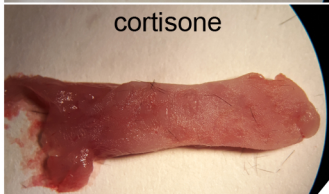

19.2336 $\Delta$

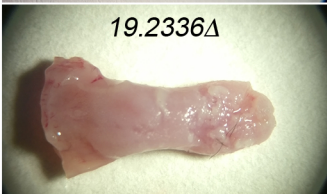

Wild Type

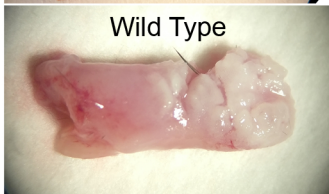

*kre5* $\Delta$

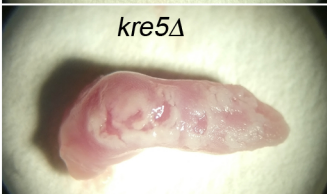

19.4880 $\Delta$

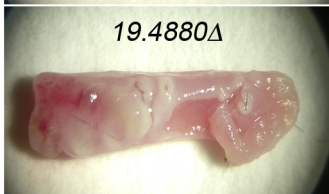

19.3751 $\Delta$

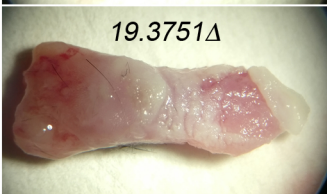

19.716 $\Delta$

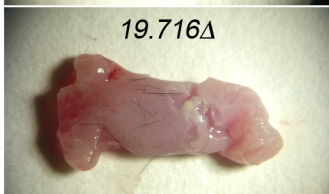

*rvs161* $\Delta$

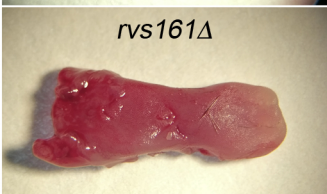

*spe1* $\Delta$

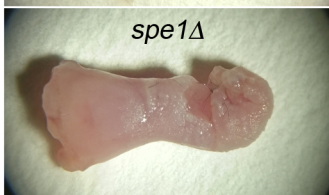

*rvs167* $\Delta$

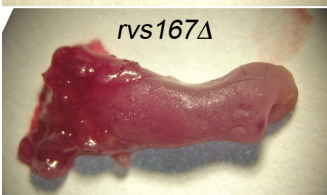

Supplement: mBio.02503-19-sf001.pdf [file mBio.02503-19-sf001.pdf]
