# Supplementary material for: Candida albicans rvs161Δ and rvs167Δ Endocytosis Mutants Are Defective in Invasion into the Oral Cavity
Source: PubMed Central journal article supplement (PMC6851284; doi:10.1128/mbio.02503-19), 2019-11-12

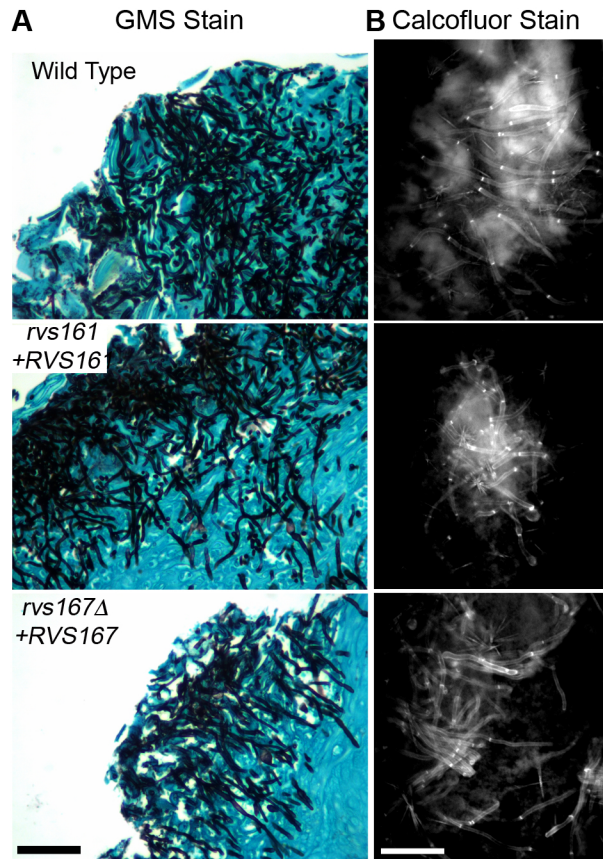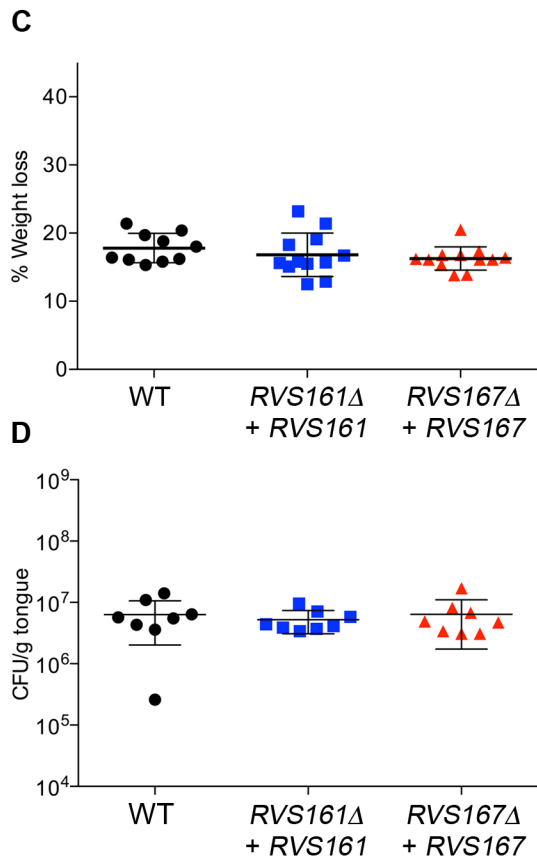

Supplement: mBio.02503-19-sf002.pdf [file mBio.02503-19-sf002.pdf]
