# Supplementary material for: Candida albicans rvs161Δ and rvs167Δ Endocytosis Mutants Are Defective in Invasion into the Oral Cavity
Source: PubMed Central journal article supplement (PMC6851284; doi:10.1128/mbio.02503-19), 2019-11-12
Supplement: mBio.02503-19-st002.pdf [file mBio.02503-19-st002.pdf]

Supplementary Table S2. *C. albicans* strains used in this study

| Strain   | Short genotype          | Full genotype                                                                                                           |
|----------|-------------------------|-------------------------------------------------------------------------------------------------------------------------|
| BWP17    | parental strain         | <i>his1::hisG/his1::hisG arg4::hisG/arg4::hisG ura3::λimm434/ura3::λimm434</i>                                          |
| DIC185   | prototrophic WT control | <i>ura3::λimm434/URA3 his1::hisG/ HIS1 arg4::hisG/ ARG4</i>                                                             |
| YLD14-3  | <i>rvs161Δ</i>          | <i>rvs161Δ::ARG4/rvs161Δ::HIS1 URA3/ura3::λimm434 his1::hisG/his1::hisG arg4::hisG/arg4::hisG</i>                       |
| YLD16-11 | <i>rvs167Δ</i>          | <i>rvs167Δ::ARG4/rvs167Δ::HIS1 URA3/ura3::λimm434 his1::hisG/his1::hisG arg4::hisG/arg4::hisG</i>                       |
|          | <i>bni4Δ</i>            | <i>bni4Δ::URA3/ bni4Δ::URA3-ARG4-URA3 HIS1/his1::hisG arg4::hisG/arg4::hisG ura3::λimm434/ura3::λimm434</i>             |
|          | <i>orf19.3751Δ</i>      | <i>orf19.3751Δ::URA3/ orf19.3751Δ::URA3-ARG4-URA3 HIS1/his1::hisG arg4::hisG/arg4::hisG ura3::λimm434/ura3::λimm434</i> |
|          | <i>spe1Δ</i>            | <i>spe1Δ::URA3/ spe1Δ::URA3-ARG4-URA3 HIS1/his1::hisG arg4::hisG/arg4::hisG ura3::λimm434/ura3::λimm434</i>             |
|          | <i>orf19.716Δ</i>       | <i>orf19.716Δ::URA3/ orf19.716Δ::URA3-ARG4-URA3 HIS1/his1::hisG arg4::hisG/arg4::hisG ura3::λimm434/ura3::λimm434</i>   |
|          | <i>orf19.2336Δ</i>      | <i>orf19.2336Δ::URA3/ orf19.2336Δ::URA3-ARG4-URA3 HIS1/his1::hisG arg4::hisG/arg4::hisG ura3::λimm434/ura3::λimm434</i> |
|          | <i>orf19.4880Δ</i>      | <i>orf19.4880Δ::URA3/ orf19.4880Δ::URA3-ARG4-URA3 HIS1/his1::hisG arg4::hisG/arg4::hisG ura3::λimm434/ura3::λimm434</i> |

*kre5Δ*      *kre5Δ::HIS1/ kre5Δ::LEU2 his1Δ/his1Δ leu2Δ/leu2Δ*  
*ARG4/arg4Δ URA3/ura3::imm IRO1/iro1Δ::imm*

*spf1Δ*      *spf1Δ::HIS1/ spf1Δ::LEU2 his1Δ/his1Δ leu2Δ/leu2Δ*  
*ARG4/arg4Δ URA3/ura3::imm IRO1/iro1Δ::imm*

*spf1Δ::HIS1/ spf1Δ::LEU2 his1Δ/his1Δ leu2Δ/leu2Δ*  
*ARG4/arg4Δ URA3/ura3::imm IRO1/iro1Δ::imm*

---
